# Supplementary material for: Clinical characteristics, breed differences, and quality of life in North American dogs with acute steroid‐responsive meningitis‐arteritis
Source: PubMed Central journal article supplement — J Vet Intern Med. 2019 Jun 7;33(4):1719–27. doi: 10.1111/jvim.15543 (PMC6639478; doi:10.1111/jvim.15543), 2019-06-07
Supplement: JVIM-33-1719-s001.pdf [file JVIM-33-1719-s001.pdf]

## Appendix S1: Supplementary Material – Quality of life survey

Please indicate your dog's breed below:

---

---

Q1 On a scale of 1-5, with 1 being no pain and 5 being severe pain, how would you rate your dog's neck pain when he/she first showed signs of SRMA?

- 1 (no pain)
- 2
- 3
- 4
- 5 (severe pain)

---

Q2 How quickly did you notice **any improvement** of clinical signs of SRMA (e.g. neck pain, fever, stiff gait) after starting steroid treatment when your dog was first diagnosed?

- 1 day
  - 2 days
  - 3-5 days
  - 5-7 days
  - more than 7 days
-

Q3 Over what time span did your dog return to normal after starting steroid treatment when your dog was first diagnosed with SRMA?

- 1 day
  - 2 days
  - 3-5 days
  - 5-7 days
  - more than 7 days
  - still abnormal
-

Q4 While your dog was being treated with steroids, indicate which of the following clinical signs that you noticed and their severity:

|                                   | Not observed          | Mild                  | Moderate              | Severe                |
|-----------------------------------|-----------------------|-----------------------|-----------------------|-----------------------|
| Increased appetite                | <input type="radio"/> | <input type="radio"/> | <input type="radio"/> | <input type="radio"/> |
| Weight gain                       | <input type="radio"/> | <input type="radio"/> | <input type="radio"/> | <input type="radio"/> |
| Increased thirst                  | <input type="radio"/> | <input type="radio"/> | <input type="radio"/> | <input type="radio"/> |
| Increased urination               | <input type="radio"/> | <input type="radio"/> | <input type="radio"/> | <input type="radio"/> |
| Urinating in inappropriate places | <input type="radio"/> | <input type="radio"/> | <input type="radio"/> | <input type="radio"/> |
| Sleeping more than before         | <input type="radio"/> | <input type="radio"/> | <input type="radio"/> | <input type="radio"/> |
| Restlessness/pacing               | <input type="radio"/> | <input type="radio"/> | <input type="radio"/> | <input type="radio"/> |
| Panting more                      | <input type="radio"/> | <input type="radio"/> | <input type="radio"/> | <input type="radio"/> |
| Skin infection                    | <input type="radio"/> | <input type="radio"/> | <input type="radio"/> | <input type="radio"/> |
| Thinning of coat                  | <input type="radio"/> | <input type="radio"/> | <input type="radio"/> | <input type="radio"/> |
| Developed pot belly               | <input type="radio"/> | <input type="radio"/> | <input type="radio"/> | <input type="radio"/> |
| Vomiting                          | <input type="radio"/> | <input type="radio"/> | <input type="radio"/> | <input type="radio"/> |
| Diarrhea                          | <input type="radio"/> | <input type="radio"/> | <input type="radio"/> | <input type="radio"/> |
| Developed other infections        | <input type="radio"/> | <input type="radio"/> | <input type="radio"/> | <input type="radio"/> |

Q5 Have you noticed any of the following changes in your dog's temperament since diagnosis of SRMA?  
(check all that apply)

- More affectionate
  - Less affectionate
  - Clingy
  - Acting more cautious/timid
  - Showing signs of aggression
  - No change noticed
- 

Q6 Has your dog's core vaccinations (rabies, distemper etc.) been up-to-date since diagnosis of SRMA?

- Yes
  - No
  - Don't know
-

Q7 Compared to before your dog was diagnosed with SRMA, how have the following activities changed for your dog since diagnosis?

|                                           | Marked decrease       | Moderate decrease     | No change             | Moderate increased    | Marked increase       |
|-------------------------------------------|-----------------------|-----------------------|-----------------------|-----------------------|-----------------------|
| Socialization with other dogs             | <input type="radio"/> |
| Socialization with people                 | <input type="radio"/> |
| Train, work, compete or breed             | <input type="radio"/> |
| Regular walks                             | <input type="radio"/> |
| Running/swimming/hiking/family activities | <input type="radio"/> |

---

Q8 Has your dog had a relapse of SRMA since diagnosis?

- Yes
- No

---

*Display this question: If Q8 = Yes*

Q9 How many relapse episodes?

- 1
- 2
- 3
- 4
- more than 4
-

*Display this question: If Q8 = Yes*

Q10 How severely affected was your dog during the relapse episode(s) as compared to the first episode?

- Similar as previous
  - Less affected
  - A bit more affected
  - Much more affected
  - Extremely affected
- 

Q11 Is your dog currently still receiving treatment for SRMA (e.g. steroids, cyclosporine, cytosar, azathioprine)?

- Yes
  - No
  - Deceased. Please indicate date of death:  
\_\_\_\_\_
- 

*Display this question: If Q11 = Deceased.*

Q12 We are sorry to hear that your dog was deceased. Do you attribute his/her death to be related to SRMA?

- Yes
  - No
- 

*Display this question: If Q11 = Deceased.*

Q13 What was the cause of your dog's death?  
\_\_\_\_\_

---

*Display this question: If Q11 = Yes*

Q14 Which of the following medications is your dog being treated with? (check all that apply)

- Prednisone
- Azathioprine
- Cyclosporine
- Cytosar (cytarabine) injections
- Gabapentin
- Omeprazole
- Other: \_\_\_\_\_

---

Q15 When was your dog last treated with steroids?

\_\_\_\_\_

---

Q16 Please rate your dog's overall quality of life **before diagnosis** of SRMA (1=poor, 10=excellent)

1 (poor)

2

3

4

5

6

7

8

9

10 (excellent)

---



Q17 Please rate your dog's quality of life **during treatment** of SRMA (1=poor, 10=excellent)

1 (Poor)

2

3

4

5

6

7

8

9

10 (excellent)

---

Q18 Please rate your dog's quality of life **during remission (no clinical signs)** of SRMA (1=poor, 10=excellent)

Please skip question if you consider your dog to not be in remission.

- 1 (Poor)
  - 2
  - 3
  - 4
  - 5
  - 6
  - 7
  - 8
  - 9
  - 10 (excellent)
-

Q19 Please rate your dog's overall quality of life *since diagnosis* of SRMA (1=poor, 10=excellent)

- 1 (Poor)
  - 2
  - 3
  - 4
  - 5
  - 6
  - 7
  - 8
  - 9
  - 10 (excellent)
-
